# Supplementary figures and images for: Glucose principally regulates insulin secretion in mouse islets by controlling the numbers of granule fusion events per cell
Source: PubMed Central journal article supplement — Diabetologia. 2013 Sep 1;56(12):2629–37. doi: 10.1007/s00125-013-3019-5 (PMC3825531; doi:10.1007/s00125-013-3019-5), 2013-09-01

ESM Fig. 1

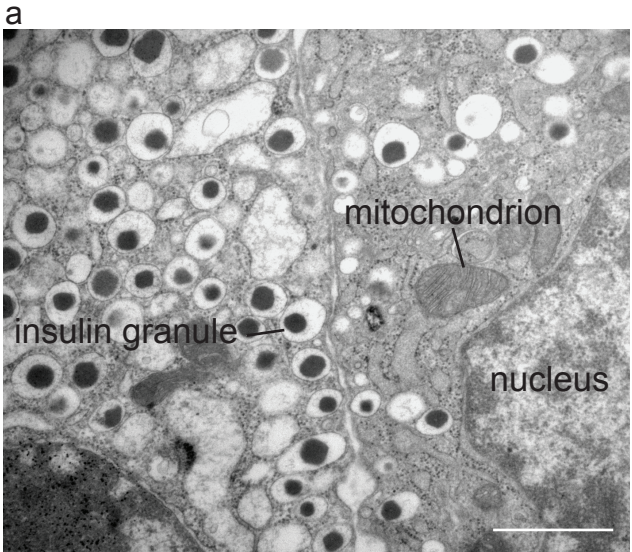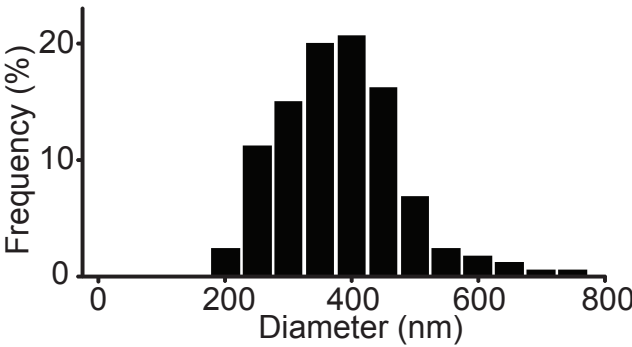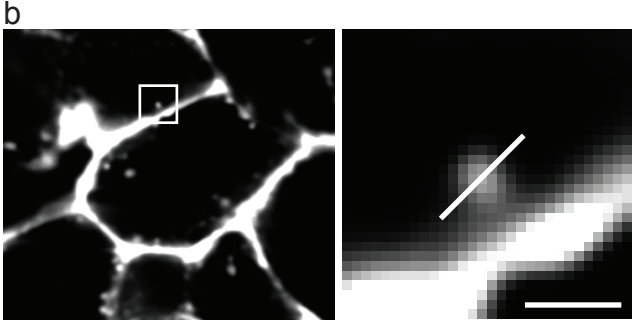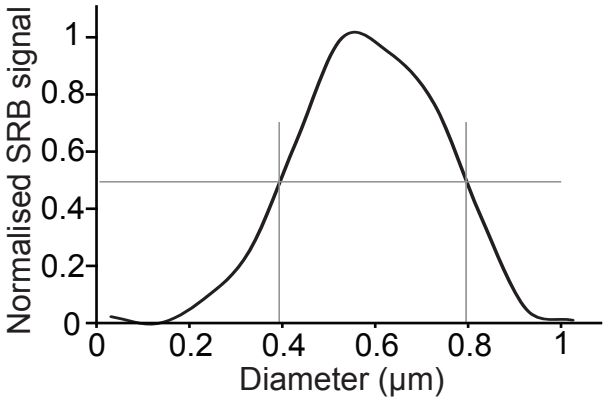

Supplement: 125_2013_3019_MOESM1_ESM.pdf [file 125_2013_3019_MOESM1_ESM.pdf]

ESM Fig. 2

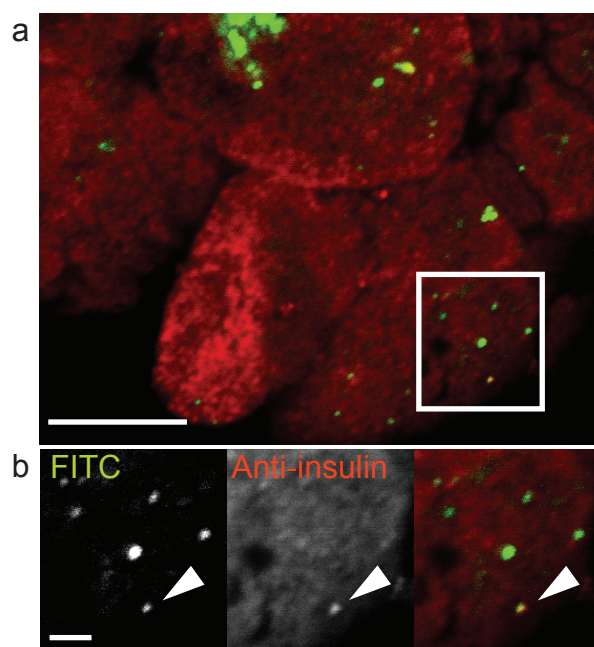

Supplement: 125_2013_3019_MOESM2_ESM.pdf [file 125_2013_3019_MOESM2_ESM.pdf]

ESM Fig. 3

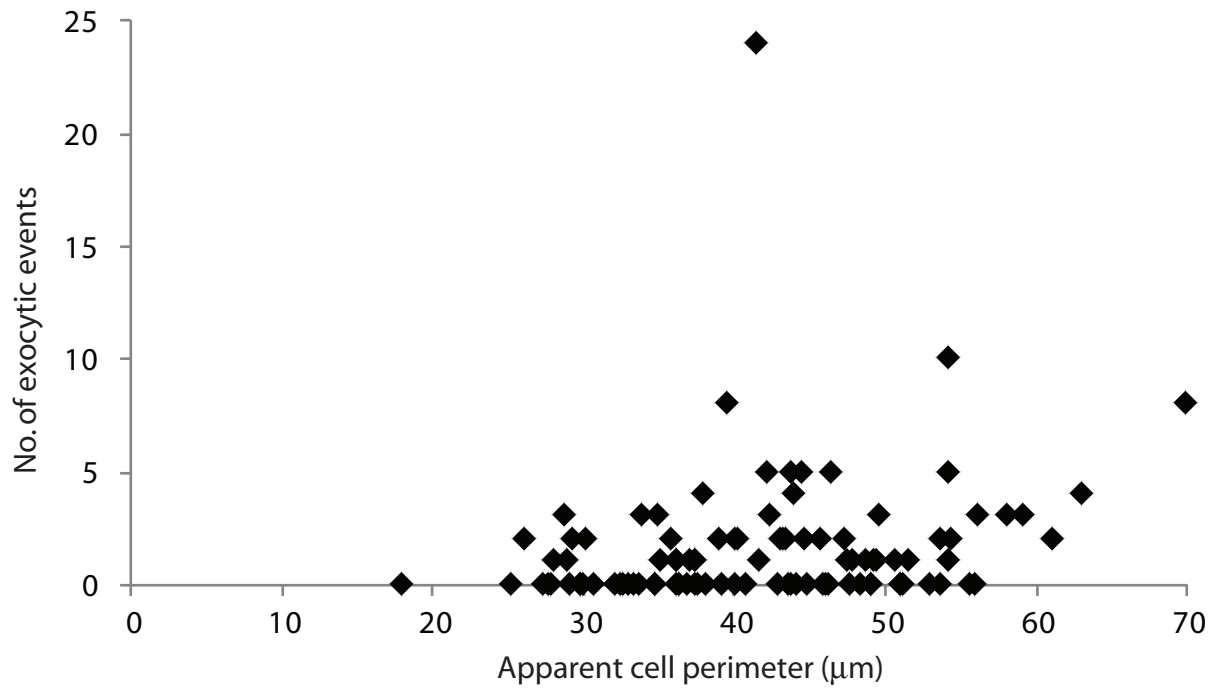

Supplement: 125_2013_3019_MOESM3_ESM.pdf [file 125_2013_3019_MOESM3_ESM.pdf]

ESM Fig. 4

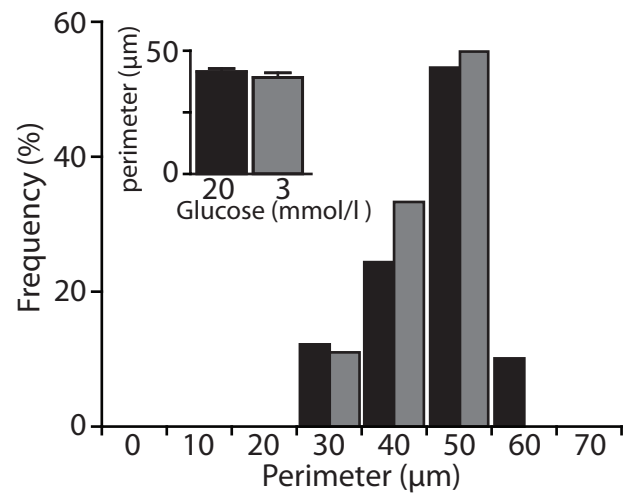

Supplement: 125_2013_3019_MOESM4_ESM.pdf [file 125_2013_3019_MOESM4_ESM.pdf]
